# Supplementary material for: Diazirine-containing RNA photocrosslinking probes for the study of siRNA–protein interactions
Source: Royal Society of Chemistry journal article supplement (doi:10.1039/c0cc02450c), 2010-01-01
Supplement: c0cc02450c.pdf [file c0cc02450c.pdf]

## Diazirine-containing RNA photocrosslinking probes for the study of siRNA-protein interactions

Satoru Kuboe<sup>a</sup>, Mayuko Yoda<sup>c,d</sup>, Aya Ogata<sup>a</sup>, Yukio Kitade<sup>a,b</sup>,  
Yukihide Tomari<sup>\*c,d</sup> and Yoshihito Ueno<sup>\*a,b</sup>

<sup>a</sup>Department of Biomolecular Science, Faculty of Engineering, Gifu University; <sup>b</sup>United Graduate School of Drug Discovery and Medical Information Sciences, Gifu University, 1-1 Yanagido, Gifu 501-1193, Japan; <sup>c</sup>Institute of Molecular and Cellular Biosciences, The University of Tokyo, Tokyo, 113-0032, Japan; <sup>d</sup>Department of Medical Genome Sciences, The University of Tokyo, 113-0032, Japan

### Supplementary Data

#### General remarks

Thin-layer chromatography was carried out on Merck coated plates 60F<sub>254</sub>. Silica gel column chromatography was carried out on Wakogel C-300. <sup>1</sup>H, <sup>13</sup>C, and <sup>19</sup>F NMR spectra were obtained with a JEOL JNM AL-400 spectrometer. CDCl<sub>3</sub> (CIL) or DMSO-*d*<sub>6</sub> (CIL) was used as a solvent for obtaining NMR spectra. Chemical shifts ( $\delta$ ) are given in parts per million (ppm) downfield from (CH<sub>3</sub>)<sub>4</sub>Si ( $\delta$  0.00 for <sup>1</sup>H NMR in CDCl<sub>3</sub>), CF<sub>3</sub>CO<sub>2</sub>H ( $\delta$  0.00 for <sup>19</sup>F NMR), or a solvent (for <sup>13</sup>C NMR and <sup>1</sup>H NMR in DMSO-*d*<sub>6</sub>) as an internal reference with coupling constants (*J*) in Hz. The abbreviations s, d, and q signify singlet, doublet, and quartet, respectively.

#### **3',5'-Bis(*tert*-butyldimethylsilyloxymethyl)-2,2,2-trifluoromethylacetophenone (5).**

To a solution of 1,3-bis(*tert*-butyldimethylsilyloxymethyl)-5-iodobenzene (**4**)<sup>1</sup> (3.94 g, 8.00 mmol) in THF (80 mL) at -78 °C was added dropwise over 30 min *n*-BuLi (1.65 M in hexane, 10.2 ml, 16.8 mmol). The solution was stirred for 15 min then ethyl trifluoroacetate (1.14 ml, 9.58 mmol) was added over 15 min. The resulting mixture was stirred at -78 °C for 1 h, quenched at -78 °C using saturated NaHCO<sub>3</sub> (50 mL) then extracted three times with EtOAc. The combined organic layer was washed with saturated NaHCO<sub>3</sub>, brine, dried (Na<sub>2</sub>SO<sub>4</sub>), and concentrated. The residue was purified by column chromatography (SiO<sub>2</sub>, 70% toluene in hexane) to give **5** (2.46 g, 5.32 mmol, 67%): <sup>1</sup>H NMR (400 MHz, CDCl<sub>3</sub>)  $\delta$  0.13 (s, 12H), 0.97 (s, 18H), 4.80 (s, 4H), 7.65 (s, 1H), 7.92 (s, 2H); <sup>13</sup>C NMR (100 MHz, CDCl<sub>3</sub>)  $\delta$  -5.4, 18.3, 25.9, 64.2, 116.7 (q, <sup>1</sup>J<sub>C-F</sub> = 311 Hz), 126.0, 129.9, 130.5, 142.8, 180.2 (q, <sup>2</sup>J<sub>C-F</sub> = 31 Hz); <sup>19</sup>F NMR (372 MHz, CDCl<sub>3</sub>)  $\delta$  -87.5. Anal. Calcd for C<sub>22</sub>H<sub>37</sub>F<sub>3</sub>O<sub>3</sub>Si<sub>2</sub>: C, 57.11; H, 8.06. Found: C, 57.17; H,

7.84.

**3',5'-Bis(*tert*-butyldimethylsilyloxymethyl)-2,2,2-trifluoromethylacetophenone**

**O-tosyl-oxime (6).** To a solution of **5** (0.47 g, 1.00 mmol) in pyridine (5 mL) and EtOH (5 mL) was added HONH<sub>2</sub>•HCl (0.10 g, 1.44 mmol). The resulting mixture was stirred at 60 °C overnight, cooled to room temperature and concentrated. The residual oil was dissolved in CHCl<sub>3</sub>. The organic layer was washed with H<sub>2</sub>O, brine, dried (Na<sub>2</sub>SO<sub>4</sub>), and concentrated. The residual oil was dissolved in CHCl<sub>3</sub> (10 mL) then Et<sub>3</sub>N (0.41 g, 4.05 mmol), a catalytic amount of DMAP and *p*-toluenesulfonyl chloride (0.28 g, 1.47 mmol) were added. The final mixture was allowed to react at room temperature overnight. The volatiles were evaporated and the residue was dissolved in CHCl<sub>3</sub>. The organic layer was washed with saturated NaHCO<sub>3</sub>, brine, dried (Na<sub>2</sub>SO<sub>4</sub>), and concentrated. The residue was purified by column chromatography (SiO<sub>2</sub>, 17% MeOH in CHCl<sub>3</sub>) to give **6** (0.54 g, 0.85 mmol, 85 %): <sup>1</sup>H NMR (400 MHz, CDCl<sub>3</sub>) δ 0.10 (s, 12H), 0.94 (s, 18H), 2.46 (s, major stereoisomer, 3/5H), 2.48 (s, minor stereoisomer, 2/5H), 4.81–4.73 (m, 4H), 7.92–7.18 (m, 7H); <sup>19</sup>F NMR (372 MHz, CDCl<sub>3</sub>) δ –87.5. Anal. Calcd for C<sub>29</sub>H<sub>44</sub>F<sub>3</sub>NO<sub>5</sub>SSi<sub>2</sub>: C, 55.12; H, 7.02; N, 2.22. Found: C, 54.93; H, 7.12; N, 2.23.

**3-[3,5-Bis(*tert*-butyldimethylsilyloxymethyl)phenyl]-3-trifluoromethyldiaziridine**

**(7).** NH<sub>3</sub> gas was bubbled through a solution of oxime **6** (0.33g, 0.52mmol) in 5% NH<sub>3</sub>/THF (30 mL) at –78 °C. The tube was sealed and the resulting solution was stirred at room temperature for 2 days. After cooling the mixture, the tube was opened and the excess NH<sub>3</sub> was allowed to escape slowly. The mixture was concentrated. The residue was purified by column chromatography (SiO<sub>2</sub>, 10–30% EtOAc in hexane) to give **7** (0.15g, 0.31 mmol, 60 %): <sup>1</sup>H NMR (CDCl<sub>3</sub>) δ 0.11 (s, 12H), 0.94 (s, 18H), 2.20 (d, 1H, *J* = 8 Hz), 2.77 (d, 1H, *J* = 8 Hz), 4.76 (s, 4H), 7.39 (s, 1H), 7.45 (s, 2H); <sup>13</sup>C NMR (100 MHz, CDCl<sub>3</sub>) δ –5.3, 18.4, 25.9, 58.0 (q, <sup>2</sup>*J*<sub>C-F</sub> = 35 Hz), 64.5, 123.5 (q, <sup>1</sup>*J*<sub>C-F</sub> = 279 Hz), 124.1, 125.2, 131.5, 142.3; <sup>19</sup>F NMR (372 MHz, CDCl<sub>3</sub>) δ –91.6. Anal. Calcd for C<sub>22</sub>H<sub>39</sub>F<sub>3</sub>N<sub>2</sub>O<sub>2</sub>Si<sub>2</sub>: C, 55.43; H, 8.25; N, 5.88. Found: C, 55.64; H, 8.01; N, 5.77.

**3-[3,5-Bis(*tert*-butyldimethylsilyloxymethyl)phenyl]-3-trifluoromethyl-3*H*-diazirine**

**(8).** To a solution of diaziridine **7** (95 mg, 0.20 mmol) in MeOH (4 mL) was added Et<sub>3</sub>N (70 μL, 0.50 mmol) and I<sub>2</sub> (56 mg, 0.22 mmol). The whole was stirred at room temperature for 30 min. The mixture was partitioned between Et<sub>2</sub>O and aqueous Na<sub>2</sub>S<sub>2</sub>O<sub>3</sub>. The organic layer was washed with brine, dried (Na<sub>2</sub>SO<sub>4</sub>), and concentrated. The residue was purified by column chromatography (SiO<sub>2</sub>, 10% EtOAc in hexane) to give **8** (70 mg, 0.15 mmol, 74%): <sup>1</sup>H NMR (400 MHz, CDCl<sub>3</sub>) δ 0.10 (s, 12H), 0.95 (s, 18H), 4.72 (s, 4H), 7.03 (s, 2H), 7.31 (s, 1H); <sup>13</sup>C NMR (100 MHz, CDCl<sub>3</sub>) δ –5.4, 18.4,

25.9, 28.52 (q,  $^2J_{C-F} = 40$  Hz), 64.4, 122.2 (q,  $^1J_{C-F} = 276$  Hz), 122.4, 124.5, 129.4, 142.4;  $^{19}F$  NMR (372 MHz,  $CDCl_3$ )  $\delta$  -81.2. Anal. Calcd for  $C_{22}H_{37}F_3N_2O_2Si_2$ : C, 55.66; H, 7.86; N, 5.90. Found: C, 55.50; H, 7.69; N, 5.92.

**3-[3,5-Bis(hydroxymethyl)phenyl]-3-trifluoromethyl-3H-diazirine (9).** To a solution of diazirine **8** (91 mg, 0.19 mmol) in THF (3.8 mL) was added TBAF (1 M in THF, 0.4 mL), and the mixture was stirred at room temperature for 2 h. The solvent was evaporated in vacuo, and the resulting residue was purified by column chromatography ( $SiO_2$ , 10–50% EtOAc in hexane) to give **9** (40 mg, 0.16 mmol, 85%):  $^1H$  NMR (400 MHz,  $DMSO-d_6$ )  $\delta$  3.20 (s, 2H), 4.52 (s, 4H), 7.06 (s, 2H), 7.33 (s, 1H);  $^{13}C$  NMR (100 MHz,  $DMSO-d_6$ )  $\delta$  28.1 (q,  $^2J_{C-F} = 40$  Hz), 62.2, 122.0 (q,  $^1J_{C-F} = 275$  Hz), 122.2, 126.0, 127.3, 143.9;  $^{19}F$  NMR (372 MHz,  $DMSO-d_6$ )  $\delta$  -80.3. Anal. Calcd for  $C_{10}H_9F_3N_2O_2 \cdot 1/10H_2O$ : C, 48.43; H, 3.74; N, 11.30. Found: C, 48.45; H, 3.83; N, 11.11.

**3-[3-(4,4'-dimethoxytrityl)oxymethyl-5-hydroxymethylphenyl]-3-trifluoromethyl-3H-diazirine (10).** A mixture of **9** (0.20 g, 0.81 mmol) and DMTrCl (0.40 g, 1.18 mmol) in pyridine (11 mL) was stirred at room temperature for 5 h. The mixture was partitioned between EtOAc and aqueous  $NaHCO_3$  (saturated). The organic layer was washed with brine, dried ( $Na_2SO_4$ ), and concentrated. The residue was purified by column chromatography ( $SiO_2$ , 40% EtOAc in hexane) to give **10** (0.17 g, 0.31 mmol, 38%):  $^1H$  NMR (400 MHz,  $CDCl_3$ )  $\delta$  3.78 (s, 6H), 4.17 (s, 2H), 4.67 (d, 2H,  $J = 4$  Hz), 6.80–7.47 (m, 16H);  $^{13}C$  NMR (100 MHz,  $CDCl_3$ )  $\delta$  28.4 (q,  $^2J_{C-F} = 40$  Hz), 55.2, 64.7, 65.0, 86.7, 113.2, 122.1 (q,  $^1J_{C-F} = 274$  Hz), 123.3, 124.1, 126.5, 126.9, 127.9, 128.1, 129.3, 130.0, 136.0, 140.7, 141.7, 144.8, 158.5;  $^{19}F$  NMR (372 MHz,  $CDCl_3$ )  $\delta$  -98.0.

**Solid Support Synthesis.** A mixture of **10** (0.17 g, 0.31 mmol), succinic anhydride (93 mg, 0.93 mmol), and DMAP (2.4 mg, 20  $\mu$ mol) in pyridine (3 mL) was stirred at room temperature. After 2 days, the solution was partitioned between  $CHCl_3$  and  $H_2O$ , and the organic layer was washed with  $H_2O$  and brine. The separated organic phase was dried ( $Na_2SO_4$ ) and concentrated to give a succinate. Aminopropyl controlled pore glass (0.65 g, 78  $\mu$ mol) was added to a solution of the succinate and EDCI (60 mg, 0.31 mmol) in DMF (8 mL), and the mixture was kept for 3 days at room temperature. After the resin was washed with pyridine, a capping solution (15 mL, 0.1 M DMAP in pyridine:Ac<sub>2</sub>O = 9:1, v/v) was added and the whole mixture was kept for 12 h at room temperature. The resin was washed with MeOH and acetone, and dried *in vacuo*. Amount of loaded compound **10** to solid support was 28  $\mu$ mol/g from calculation of released dimethoxytrityl cation by a solution of 70%  $HClO_4$ :EtOH (3:2, v/v).

**RNA Synthesis.** Synthesis was carried out with a DNA/RNA synthesizer by phosphoramidite method. Deprotection of bases and phosphates was performed in

concentrated  $\text{NH}_4\text{OH}:\text{EtOH}$  (3:1, v/v) at room temperature for 12 h. 2'-TBDMS groups were removed by TBAF (Aldrich) in THF at room temperature for 12 h. The reaction was quenched with 0.1 M TEAA buffer (pH 7.0) and desalted on a Sep-Pak C18 cartridge. Deprotected ONs were purified by 20% PAGE containing 7 M urea to give the highly purified ON5 (14), ON9 (11). The yields are indicated in parentheses as OD units at 260 nm starting from 1.0  $\mu\text{mol}$  scale.

**MALDI-TOF/MS Analysis of RNAs.** Spectra were obtained with a SHIMAZU/KRATOS time-of-flight mass spectrometer equipped with a nitrogen laser (337 nm, 3-ns pulse). A solution of 3-hydroxypicolinic acid (3-HPA) and diammonium hydrogen citrate in  $\text{H}_2\text{O}$  was used as the matrix. ON5:  $m/z = 6708.2$  ( $[\text{M}-\text{H}]^-$ , calculated 6707.9;  $\text{C}_{203}\text{H}_{243}\text{F}_3\text{N}_{84}\text{O}_{136}\text{P}_{20}$  (MW = 6708.9). ON9:  $m/z = 6790.0$  ( $[\text{M}-\text{H}]^-$ , calculated 6792.9;  $\text{C}_{203}\text{H}_{242}\text{F}_3\text{N}_{81}\text{O}_{144}\text{P}_{20}$  (MW = 6793.9).

**Dual-Luciferase Assay.** HeLa cells were grown at 37 °C in a humidified atmosphere of 5%  $\text{CO}_2$  in air in Minimum Essential Medium (MEM) (Invitrogen) supplemented with 10% fetal bovine serum (FBS). Twenty-four hours before transfection, HeLa cells ( $4 \times 10^4/\text{mL}$ ) were transferred to 96-well plates (100  $\mu\text{L}$  per well). They were transfected, using TransFast (Promega), according to instructions for transfection of adherent cell lines. Cells in each well were transfected with a solution (35  $\mu\text{L}$ ) of 20 ng of psiCHECK-2 vector (Promega), the indicated amounts of siRNAs, and 0.3  $\mu\text{g}$  of TransFast in Opti-MEM I Reduced-Serum Medium (Invitrogen), and incubated at 37 °C. Transfection without siRNA was used as a control. After 1 hour, MEM (100  $\mu\text{L}$ ) containing 10% FBS and antibiotics was added to each well, and the whole was further incubated at 37 °C. After 24 h, cell extracts were prepared in Passive Lysis Buffer (Promega). Activities of firefly and *Renilla* luciferases in cell lysates were determined with a dual-luciferase assay system (Promega) according to a manufacturer's protocol. The results were confirmed by at least three independent transfection experiments with two cultures each and are expressed as the average from four experiments as mean  $\pm$  SD.

**In vitro RISC assembly and photocrosslinking.** *Drosophila* embryo lysate, lysis buffer, and 40x reaction mix were prepared as described before.<sup>2</sup> RISC assembly was typically performed in 50  $\mu\text{L}$  reaction, containing 25  $\mu\text{L}$  of embryo lysate, 15  $\mu\text{L}$  of 40x reaction mix and 5  $\mu\text{L}$  of 100 nM  $^{32}\text{P}$  radiolabeled siRNA duplexes at 25 °C. 10- $\mu\text{L}$  aliquots were then taken at indicated time points, irradiated with 302 nm UV-B or 365 nm UV-A for 5 min (~1 cm under 6W UV-B or UV-A bulb), and subjected to SDS-PAGE.

### References for supplementary data

1. Y. Ueno, A. Kawamura, K. Takasu, S. Komatsuzaki, T. Kato, S. Kuboe, Y. Kitamura and Y. Kitade, *Org. Biomol. Chem.*, 2009, **7**, 2761–2769.
2. B. Haley, G. Tang and P. D. Zamore, *Methods*, 2003, **30**, 330–336.
